# Supplementary material for: Coral Holobionts Possess Distinct Lipid Profiles That May Be Shaped by Symbiodiniaceae Taxonomy
Source: MDPI journal article supplement (doi:10.3390/md20080485), 2022-07-28
Supplement: s1 [file s1]

**Table S1**

Profiles of the thylakoid lipid molecular species (% of sum in lipid class) and content in lipid extract of the corals *Acropora sp.*, *Sinularia flexibilis* and *Millepora phlatyphylla*. Abbreviations: sulfoquinovosyldiacylglycerol (SQDG), mono- and digalactosyldiacylglycerol (MGDG and DGDG), and phosphatidylglycerol (PG).

|                   | <i>Acropora sp.</i>                     |       |       |       |       | <i>Sinularia flexibilis</i> |        |        |        |        | <i>Millepora phlatyphylla</i> |       |       |       |       |
|-------------------|-----------------------------------------|-------|-------|-------|-------|-----------------------------|--------|--------|--------|--------|-------------------------------|-------|-------|-------|-------|
| Molecular species | A1                                      | A2    | A3    | A4    | A5    | S1                          | S2     | S3     | S4     | S5     | M1                            | M2    | M3    | M4    | M5    |
| <b>PG</b>         | <b>Content, % of sum in lipid class</b> |       |       |       |       |                             |        |        |        |        |                               |       |       |       |       |
| 32:0//            | 0.00                                    | 0.00  | 0.00  | 0.00  | 0.00  | 0.00                        | 0.00   | 0.00   | 0.00   | 0.00   | 2.21                          | 4.93  | 3.20  | 5.63  | 3.93  |
| 32:1//            | 0.00                                    | 0.00  | 0.00  | 0.00  | 0.00  | 0.00                        | 0.00   | 0.00   | 0.00   | 0.00   | 1.44                          | 13.40 | 4.21  | 8.78  | 9.24  |
| 16:0/18:1         | 0.00                                    | 0.00  | 0.00  | 0.00  | 0.00  | 0.00                        | 0.00   | 0.00   | 0.00   | 0.00   | 17.01                         | 17.56 | 11.84 | 19.78 | 9.58  |
| 16:0/18:2         | 0.00                                    | 0.00  | 0.00  | 0.00  | 0.00  | 0.00                        | 0.00   | 0.00   | 0.00   | 0.00   | 21.30                         | 11.96 | 18.64 | 31.82 | 15.08 |
| 16:1/18:2         | 0.00                                    | 0.00  | 0.00  | 0.00  | 0.00  | 0.00                        | 0.00   | 0.00   | 0.00   | 0.00   | 4.40                          | 0.16  | 51.70 | 11.22 | 40.73 |
| 19:2/16:1         | 30.66                                   | 42.10 | 34.70 | 37.73 | 32.01 | 0.00                        | 0.00   | 0.00   | 0.00   | 0.00   | 33.04                         | 35.98 | 9.06  | 12.43 | 11.41 |
| 16:0/20:1         | 14.41                                   | 14.42 | 15.70 | 15.44 | 24.74 | 0.00                        | 0.00   | 0.00   | 0.00   | 0.00   | 0.00                          | 0.00  | 0.00  | 0.00  | 0.00  |
| 36:2//            | 3.42                                    | 5.93  | 3.15  | 1.86  | 2.77  | 0.00                        | 0.00   | 0.00   | 0.00   | 0.00   | 3.63                          | 3.78  | 1.31  | 2.33  | 1.26  |
| 16:2/20:2         | 51.51                                   | 37.56 | 46.44 | 44.97 | 40.49 | 100.00                      | 100.00 | 100.00 | 100.00 | 100.00 | 16.96                         | 12.23 | 0.04  | 8.01  | 8.77  |
| <b>SQDG</b>       | <b>Content, % of sum in lipid class</b> |       |       |       |       |                             |        |        |        |        |                               |       |       |       |       |
| 14:0/14:0         | 2.72                                    | 1.69  | 2.50  | 3.57  | 8.69  | 1.68                        | 3.06   | 1.67   | 1.21   | 1.30   | 2.10                          | 1.03  | 0.14  | 0.91  | 0.66  |
| 14:2/16:0         | 0.00                                    | 0.00  | 0.00  | 0.00  | 0.00  | 3.53                        | 5.68   | 4.46   | 4.49   | 3.58   | 0.00                          | 0.00  | 0.00  | 0.00  | 0.00  |
| 16:0/14:1         | 25.26                                   | 27.90 | 39.73 | 43.47 | 42.97 | 14.80                       | 25.20  | 20.29  | 17.92  | 17.12  | 37.11                         | 28.78 | 2.66  | 9.95  | 6.07  |
| 14:0/16:0         | 59.71                                   | 51.83 | 55.43 | 45.92 | 42.00 | 32.79                       | 38.38  | 38.33  | 38.91  | 42.88  | 31.79                         | 34.76 | 5.25  | 18.25 | 11.93 |
| 32:4//            | 0.00                                    | 0.00  | 0.00  | 0.00  | 0.00  | 0.50                        | 0.48   | 0.41   | 0.74   | 0.41   | 0.00                          | 0.00  | 0.00  | 0.00  | 0.00  |
| 16:0/16:3         | 0.00                                    | 0.00  | 0.00  | 0.00  | 0.00  | 2.67                        | 5.42   | 3.56   | 2.73   | 2.42   | 0.00                          | 0.00  | 0.00  | 0.00  | 0.00  |
| 16:0/16:2         | 0.00                                    | 0.00  | 0.00  | 0.00  | 0.00  | 7.43                        | 7.02   | 8.15   | 9.62   | 8.47   | 0.00                          | 0.00  | 0.00  | 0.00  | 0.00  |
| 16:0/16:1         | 1.16                                    | 0.62  | 0.17  | 0.00  | 0.14  | 0.00                        | 0.00   | 0.00   | 0.00   | 0.00   | 2.46                          | 0.54  | 1.44  | 2.64  | 2.31  |
| 16:0/16:0         | 10.97                                   | 17.96 | 2.31  | 4.99  | 6.20  | 31.86                       | 14.76  | 23.13  | 24.37  | 24.03  | 16.36                         | 23.72 | 37.52 | 43.35 | 32.50 |
| 16:0/17:0         | 0.00                                    | 0.00  | 0.00  | 0.00  | 0.00  | 0.00                        | 0.00   | 0.00   | 0.00   | 0.00   | 0.00                          | 0.00  | 0.63  | 0.12  | 0.31  |
| 16:0/18:3         | 0.00                                    | 0.00  | 0.00  | 0.00  | 0.00  | 0.00                        | 0.00   | 0.00   | 0.00   | 0.00   | 1.19                          | 0.00  | 0.84  | 0.77  | 1.29  |
| 16:0/18:2         | 0.00                                    | 0.00  | 0.00  | 0.00  | 0.00  | 0.00                        | 0.00   | 0.00   | 0.00   | 0.00   | 3.54                          | 2.33  | 4.22  | 6.10  | 5.15  |
| 16:0/18:1         | 0.00                                    | 0.00  | 0.00  | 0.00  | 0.00  | 0.00                        | 0.00   | 0.00   | 0.00   | 0.00   | 4.10                          | 5.83  | 44.58 | 16.98 | 38.34 |

|                                  |                                  |        |        |       |        |       |        |        |        |        |       |       |       |       |       |
|----------------------------------|----------------------------------|--------|--------|-------|--------|-------|--------|--------|--------|--------|-------|-------|-------|-------|-------|
| 16:0/18:0                        | 0.00                             | 0.00   | 0.00   | 0.00  | 0.00   | 0.00  | 0.00   | 0.00   | 0.00   | 0.00   | 1.36  | 1.27  | 2.21  | 0.92  | 1.45  |
| SQDG with PUFAs                  | 0.00                             | 0.00   | 0.00   | 0.00  | 0.00   | 14.13 | 18.60  | 16.58  | 17.58  | 14.88  | 1.19  | 0.00  | 0.84  | 0.77  | 1.29  |
| SQDG with C <sub>17-18</sub> FAs | 0.00                             | 0.00   | 0.00   | 0.00  | 0.00   | 0.00  | 0.00   | 0.00   | 0.00   | 0.00   | 10.18 | 9.44  | 52.48 | 24.90 | 46.53 |
| SQDG with MUFAs                  | 26.42                            | 28.53  | 39.90  | 43.47 | 43.12  | 14.80 | 25.20  | 20.29  | 17.92  | 17.12  | 43.67 | 35.15 | 48.68 | 29.58 | 46.72 |
| SQDG with SFAs                   | 73.39                            | 71.47  | 60.24  | 54.48 | 56.88  | 66.32 | 56.20  | 63.13  | 64.49  | 68.21  | 51.61 | 60.77 | 45.74 | 63.55 | 46.84 |
| SQDG with C <sub>14-16</sub> FAs | 99.81                            | 100.00 | 100.14 | 97.95 | 100.00 | 95.25 | 100.00 | 100.00 | 100.00 | 100.22 | 89.82 | 88.82 | 47.01 | 75.10 | 53.47 |
| MGDG                             | Content, % of sum in lipid class |        |        |       |        |       |        |        |        |        |       |       |       |       |       |
| 30:0//                           | 0.36                             | 0.07   | 0.29   | 0.20  | 0.28   | 0.00  | 0.00   | 0.00   | 0.00   | 0.00   | 0.00  | 0.00  | 0.00  | 0.00  | 0.00  |
| 32:5//                           | 0.00                             | 0.00   | 0.00   | 0.00  | 0.00   | 3.37  | 2.80   | 3.68   | 2.72   | 3.40   | 0.00  | 0.00  | 0.00  | 0.00  | 0.00  |
| 32:4//                           | 0.00                             | 0.00   | 1.76   | 0.00  | 0.00   | 9.15  | 7.72   | 8.21   | 8.34   | 9.41   | 0.00  | 0.00  | 0.00  | 0.00  | 0.00  |
| 16:0/16:3                        | 0.00                             | 0.00   | 0.21   | 0.00  | 0.00   | 12.59 | 11.80  | 9.13   | 9.85   | 10.60  | 0.00  | 0.00  | 0.00  | 0.00  | 0.00  |
| 16:0/16:2                        | 0.00                             | 0.00   | 0.00   | 0.00  | 0.00   | 17.29 | 15.64  | 10.11  | 8.46   | 9.93   | 0.00  | 0.00  | 0.00  | 0.00  | 0.00  |
| 16:0/16:1                        | 0.00                             | 0.00   | 0.74   | 0.00  | 0.00   | 0.00  | 0.00   | 0.00   | 0.00   | 0.00   | 0.00  | 0.00  | 0.00  | 0.00  | 0.00  |
| 16:3/18:5                        | 0.00                             | 0.00   | 0.00   | 0.00  | 0.00   | 3.06  | 2.99   | 3.36   | 2.22   | 1.38   | 0.00  | 0.00  | 0.00  | 0.00  | 0.00  |
| 16:3/18:4                        | 0.00                             | 0.00   | 0.00   | 0.00  | 0.00   | 10.93 | 10.74  | 13.80  | 11.04  | 10.71  | 0.00  | 0.00  | 0.00  | 0.00  | 0.00  |
| 16:2/18:4                        | 0.00                             | 0.00   | 0.00   | 0.00  | 0.00   | 6.66  | 6.30   | 7.05   | 8.36   | 8.17   | 0.77  | 1.21  | 27.81 | 7.76  | 22.26 |
| 16:2/18:3                        | 0.64                             | 0.77   | 1.61   | 0.63  | 0.86   | 0.00  | 0.00   | 0.00   | 0.00   | 0.00   | 0.89  | 0.00  | 5.92  | 4.79  | 9.23  |
| 16:2/18:2                        | 1.15                             | 2.82   | 1.57   | 2.35  | 2.50   | 0.00  | 0.00   | 0.00   | 0.00   | 0.00   | 12.27 | 0.00  | 14.54 | 24.04 | 12.55 |
| 16:0/18:3                        | 0.69                             | 0.84   | 0.97   | 0.93  | 0.97   | 0.00  | 0.00   | 0.00   | 0.00   | 0.00   | 0.44  | 0.00  | 1.73  | 0.49  | 0.32  |
| 16:0/18:2                        | 0.42                             | 0.87   | 0.22   | 0.56  | 0.43   | 0.00  | 0.00   | 0.00   | 0.00   | 0.00   | 2.69  | 0.32  | 1.56  | 2.84  | 1.09  |
| 34:1//                           | 0.00                             | 0.00   | 0.00   | 0.00  | 0.00   | 0.00  | 0.00   | 0.00   | 0.00   | 0.00   | 0.00  | 0.00  | 0.00  | 0.24  | 0.00  |
| 18:5/18:5                        | 0.00                             | 0.00   | 0.00   | 0.00  | 0.00   | 0.00  | 0.00   | 0.00   | 0.00   | 0.00   | 6.79  | 2.33  | 1.31  | 5.79  | 3.54  |
| 18:4/18:5; 16:4/20:5             | 21.62                            | 21.73  | 20.67  | 21.63 | 20.14  | 7.29  | 8.00   | 9.39   | 7.95   | 6.90   | 57.15 | 87.85 | 32.45 | 38.11 | 32.32 |
| 18:4/18:4                        | 21.48                            | 18.82  | 20.82  | 21.97 | 19.97  | 20.37 | 23.93  | 28.57  | 30.11  | 28.67  | 11.87 | 7.69  | 11.48 | 9.35  | 12.69 |
| 18:3/18:4                        | 13.07                            | 13.36  | 13.83  | 13.27 | 12.92  | 0.00  | 0.00   | 0.00   | 0.00   | 0.00   | 0.00  | 0.00  | 1.04  | 0.00  | 2.28  |
| 18:3/18:3                        | 8.33                             | 6.02   | 7.01   | 6.64  | 8.73   | 0.00  | 0.00   | 0.00   | 0.00   | 0.00   | 5.06  | 0.42  | 2.12  | 7.45  | 2.89  |
| 18:5/20:5                        | 7.58                             | 7.37   | 7.32   | 8.51  | 9.06   | 0.00  | 0.00   | 0.00   | 0.00   | 0.00   | 0.00  | 0.00  | 0.00  | 0.00  | 0.00  |
| 16:3/22:6; 18:4/20:5             | 11.85                            | 10.26  | 10.50  | 11.30 | 10.83  | 9.30  | 10.09  | 6.70   | 10.31  | 10.45  | 0.00  | 0.00  | 0.00  | 0.00  | 0.00  |
| 18:3/20:5                        | 7.64                             | 7.18   | 7.41   | 7.37  | 9.22   | 0.00  | 0.00   | 0.00   | 0.00   | 0.00   | 0.00  | 0.00  | 0.00  | 0.00  | 0.00  |
| 18:5//22:6                       | 1.08                             | 1.88   | 1.32   | 0.93  | 1.31   | 0.00  | 0.00   | 0.00   | 0.00   | 0.00   | 0.00  | 0.00  | 0.00  | 0.00  | 0.00  |

|                         |                                  |       |       |       |       |       |       |       |       |       |       |       |       |       |       |
|-------------------------|----------------------------------|-------|-------|-------|-------|-------|-------|-------|-------|-------|-------|-------|-------|-------|-------|
| 18:4/22:6               | 2.02                             | 2.05  | 2.35  | 1.01  | 1.21  | 0.00  | 0.00  | 0.00  | 0.00  | 0.00  | 0.00  | 0.00  | 0.00  | 0.00  | 0.00  |
| 18:3/22:6               | 0.92                             | 0.71  | 1.23  | 0.75  | 1.19  | 0.00  | 0.00  | 0.00  | 0.00  | 0.00  | 0.00  | 0.00  | 0.00  | 0.00  | 0.00  |
| 20:5/22:6               | 0.70                             | 0.35  | 0.49  | 0.25  | 0.38  | 0.00  | 0.00  | 0.00  | 0.00  | 0.00  | 0.00  | 0.00  | 0.00  | 0.00  | 0.00  |
| C <sub>30-34</sub> MGDG | 3.26                             | 5.37  | 7.37  | 4.67  | 5.04  | 63.04 | 57.98 | 55.34 | 50.97 | 53.59 | 17.05 | 1.53  | 51.57 | 40.16 | 45.45 |
| C <sub>36-38</sub> MGDG | 91.57                            | 84.75 | 87.56 | 90.68 | 90.87 | 36.96 | 42.02 | 44.66 | 48.36 | 46.02 | 80.87 | 98.29 | 48.40 | 60.70 | 53.71 |
| C <sub>40-42</sub> MGDG | 4.72                             | 4.99  | 5.40  | 2.93  | 4.09  | 0.00  | 0.00  | 0.00  | 0.00  | 0.00  | 0.00  | 0.00  | 0.00  | 0.00  | 0.00  |
| MGDG 0-5 d.b.           | 3.26                             | 5.37  | 7.37  | 4.67  | 5.04  | 42.39 | 37.95 | 31.13 | 29.36 | 33.33 | 16.29 | 0.32  | 23.76 | 32.40 | 23.19 |
| MGDG 6-8 d.b.           | 50.52                            | 45.38 | 49.07 | 49.24 | 50.83 | 41.01 | 43.95 | 52.78 | 51.72 | 48.93 | 17.69 | 9.32  | 42.45 | 24.56 | 40.11 |
| MGDG 9-11 d.b.          | 45.77                            | 44.36 | 43.88 | 44.37 | 44.12 | 16.60 | 18.09 | 16.09 | 18.26 | 17.35 | 63.94 | 90.18 | 33.76 | 43.90 | 35.86 |
| DGDG                    | Content, % of sum in lipid class |       |       |       |       |       |       |       |       |       |       |       |       |       |       |
| 16:4/16:0; 16:2/16:2    | 0.00                             | 0.00  | 0.00  | 0.00  | 0.00  | 6.93  | 5.17  | 7.74  | 6.73  | 6.21  | 0.00  | 0.00  | 0.00  | 0.00  | 0.00  |
| 16:0/16:3; 16:1/16:2    | 0.00                             | 0.00  | 0.00  | 0.00  | 0.00  | 10.03 | 4.83  | 4.91  | 4.57  | 2.49  | 0.00  | 0.00  | 0.00  | 0.00  | 0.00  |
| 16:0/16:2               | 0.00                             | 0.00  | 0.00  | 0.00  | 0.00  | 13.01 | 4.22  | 6.92  | 5.64  | 8.28  | 0.00  | 0.00  | 0.00  | 0.00  | 0.00  |
| 18:4/16:4               | 0.00                             | 0.00  | 0.00  | 0.00  | 0.00  | 3.47  | 3.24  | 4.28  | 7.13  | 6.43  | 0.00  | 0.00  | 0.00  | 0.00  | 0.00  |
| 16:3/18:4               | 0.00                             | 0.00  | 0.00  | 0.00  | 0.00  | 6.38  | 11.10 | 6.93  | 20.72 | 16.88 | 0.00  | 0.00  | 0.00  | 0.00  | 0.00  |
| 16:2/18:4               | 0.00                             | 0.00  | 0.00  | 0.00  | 0.00  | 3.68  | 3.86  | 5.25  | 2.07  | 3.45  | 0.00  | 0.00  | 0.00  | 0.00  | 0.00  |
| 18:2/16:2               | 0.00                             | 0.00  | 0.00  | 0.00  | 0.00  | 0.00  | 0.00  | 0.00  | 0.00  | 0.00  | 2.08  | 0.90  | 11.64 | 3.45  | 7.06  |
| 18:2/16:1               | 0.00                             | 0.00  | 0.00  | 0.00  | 0.00  | 0.00  | 0.00  | 0.00  | 0.00  | 0.00  | 0.00  | 0.00  | 3.59  | 1.60  | 3.18  |
| 18:2/16:0               | 0.00                             | 0.00  | 0.00  | 0.00  | 0.00  | 0.00  | 0.00  | 0.00  | 0.00  | 0.00  | 7.63  | 1.71  | 28.58 | 18.78 | 34.77 |
| 18:1/16:0               | 0.00                             | 0.00  | 0.00  | 0.00  | 0.00  | 0.00  | 0.00  | 0.00  | 0.00  | 0.00  | 0.59  | 0.00  | 8.43  | 3.68  | 6.58  |
| 18:4/18:5               | 15.96                            | 9.57  | 13.72 | 0.77  | 7.86  | 3.24  | 6.22  | 2.84  | 10.37 | 8.34  | 22.52 | 23.55 | 4.48  | 18.66 | 7.12  |
| 18:4/18:4               | 22.12                            | 15.61 | 20.05 | 6.07  | 8.91  | 31.91 | 34.64 | 37.23 | 14.36 | 23.63 | 3.77  | 7.76  | 1.39  | 5.27  | 0.73  |
| 18:3/18:4               | 9.61                             | 5.57  | 6.15  | 13.97 | 9.65  | 0.00  | 0.00  | 0.00  | 0.00  | 0.00  | 0.00  | 0.00  | 0.00  | 0.00  | 0.00  |
| 18:3/18:3               | 0.90                             | 3.24  | 4.71  | 5.86  | 7.77  | 0.00  | 0.00  | 0.00  | 0.00  | 0.00  | 0.00  | 1.58  | 0.00  | 0.00  | 0.00  |
| 36:5//                  | 0.00                             | 0.00  | 0.00  | 0.00  | 0.00  | 0.00  | 0.00  | 0.00  | 0.00  | 0.00  | 0.44  | 0.00  | 0.00  | 0.24  | 0.37  |
| 18:2/18:2               | 0.00                             | 0.00  | 0.00  | 0.00  | 0.00  | 0.00  | 0.00  | 0.00  | 0.00  | 0.00  | 0.48  | 0.00  | 5.27  | 3.60  | 4.32  |
| 36:3//                  | 0.00                             | 0.00  | 0.00  | 0.00  | 0.00  | 0.00  | 0.00  | 0.00  | 0.00  | 0.00  | 0.04  | 0.00  | 1.23  | 0.35  | 0.62  |
| 18:5/20:5               | 13.75                            | 15.14 | 14.45 | 7.91  | 10.27 | 2.86  | 4.55  | 3.08  | 0.20  | 1.42  | 8.56  | 9.31  | 3.69  | 14.09 | 2.64  |
| 18:4/20:5               | 21.15                            | 26.86 | 17.70 | 28.62 | 19.38 | 17.42 | 21.18 | 19.86 | 27.68 | 22.56 | 14.81 | 12.53 | 1.71  | 7.15  | 4.93  |
| 18:3/20:5               | 8.20                             | 11.34 | 15.14 | 25.70 | 25.17 | 0.00  | 0.00  | 0.00  | 0.00  | 0.00  | 0.00  | 0.00  | 0.00  | 0.00  | 0.00  |

|                         |                                    |        |        |        |        |        |        |        |        |        |        |        |        |        |         |      |
|-------------------------|------------------------------------|--------|--------|--------|--------|--------|--------|--------|--------|--------|--------|--------|--------|--------|---------|------|
| 20:5/19:5               | 0.00                               | 0.00   | 0.00   | 0.00   | 0.00   | 0.00   | 0.00   | 0.00   | 0.00   | 0.00   | 0.00   | 1.46   | 0.96   | 0.00   | 0.00    | 0.41 |
| 18:4/22:6               | 2.71                               | 4.95   | 2.62   | 3.66   | 2.86   | 2.41   | 1.28   | 0.95   | 0.17   | 0.12   | 26.45  | 27.87  | 21.12  | 16.46  | 19.05   |      |
| 18:3/22:6               | 1.59                               | 0.59   | 2.72   | 3.90   | 4.83   | 0.00   | 0.00   | 0.00   | 0.00   | 0.00   | 0.35   | 0.00   | 0.00   | 0.00   | 0.00    |      |
| 20:5/22:6               | 1.35                               | 2.75   | 2.74   | 3.18   | 3.67   | 0.00   | 0.00   | 0.00   | 0.00   | 0.00   | 8.19   | 8.61   | 6.33   | 6.85   | 8.03    |      |
| C <sub>30-34</sub> DGDG | 0.00                               | 0.00   | 0.00   | 0.00   | 0.00   | 43.51  | 32.42  | 36.04  | 46.85  | 43.74  | 10.29  | 2.61   | 52.24  | 27.50  | 51.59   |      |
| C <sub>36-38</sub> DGDG | 91.69                              | 87.32  | 91.92  | 88.91  | 89.01  | 55.43  | 66.59  | 63.01  | 52.61  | 55.95  | 50.62  | 54.73  | 17.78  | 49.36  | 20.73   |      |
| C <sub>40-42</sub> DGDG | 5.66                               | 8.29   | 8.08   | 10.74  | 11.36  | 2.41   | 1.28   | 0.95   | 0.17   | 0.12   | 34.99  | 36.47  | 27.45  | 23.31  | 27.08   |      |
| DGDG 0-5 d.b.           | 0.00                               | 0.00   | 0.00   | 0.00   | 0.00   | 29.97  | 14.21  | 19.58  | 16.94  | 16.98  | 11.26  | 2.61   | 58.74  | 31.69  | 56.90   |      |
| DGDG 6-8 d.b.           | 40.83                              | 35.75  | 46.05  | 51.60  | 51.50  | 45.45  | 52.85  | 53.69  | 44.28  | 50.39  | 3.77   | 9.34   | 1.39   | 5.27   | 0.73    |      |
| DGDG 9-11 d.b.          | 56.52                              | 59.85  | 53.95  | 48.05  | 48.87  | 25.93  | 33.22  | 26.73  | 38.42  | 32.43  | 82.34  | 82.82  | 37.34  | 63.21  | 42.18   |      |
| <b>Lipid class</b>      | <b>Content, % of lipid extract</b> |        |        |        |        |        |        |        |        |        |        |        |        |        |         |      |
| <b>PG</b>               | 0.1469                             | 0.0440 | 0.0867 | 0.0219 | 0.0594 | 0.0039 | 0.0062 | 0.0060 | 0.0053 | 0.0031 | 0.0253 | 0.0123 | 0.1440 | 0.0690 | 0.0742  |      |
| <b>SQDG</b>             | 6.8812                             | 2.0479 | 4.9016 | 0.8488 | 1.5265 | 1.6173 | 0.8970 | 0.4970 | 1.0035 | 0.8697 | 1.6642 | 0.8604 | 5.8907 | 6.1965 | 13.8563 |      |
| <b>MGDG</b>             | 4.8600                             | 2.2676 | 5.3240 | 1.9574 | 3.6616 | 3.0129 | 3.0175 | 1.8573 | 3.8879 | 1.9384 | 2.2169 | 1.2342 | 2.2867 | 2.8618 | 2.8500  |      |
| <b>DGDG</b>             | 4.8848                             | 3.9898 | 6.1799 | 4.2784 | 6.4828 | 2.2608 | 2.2917 | 1.7600 | 0.9912 | 0.8608 | 3.2406 | 3.4490 | 3.3638 | 3.0186 | 2.9500  |      |
| <b>Lipid class</b>      | <b>Ratio of lipids</b>             |        |        |        |        |        |        |        |        |        |        |        |        |        |         |      |
| SQDG/PG                 | 46.85                              | 46.51  | 56.55  | 38.70  | 25.71  | 415.95 | 144.86 | 82.32  | 188.52 | 278.71 | 65.79  | 69.80  | 40.92  | 89.76  | 186.68  |      |
| DGDG/MGDG               | 1.01                               | 1.76   | 1.16   | 2.19   | 1.77   | 0.75   | 0.76   | 0.95   | 0.25   | 0.44   | 1.46   | 2.79   | 1.47   | 1.05   | 1.04    |      |

PG, MGDG, DGDG, SQDG: *sn*-1(2) acyl/ *sn*-2(1) acyl

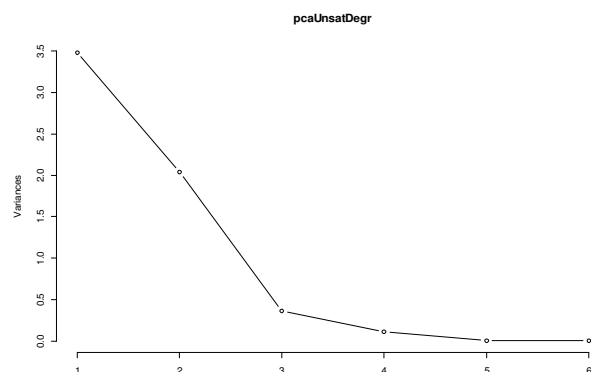

**Figure S1** PCA analysis (additional data) of coral glycolipid molecular species grouping on the basis of double bounds: MGDG and DGDG with 0-5 double bounds, MGDG and DGDG with 6-8 double bounds, and MGDG and DGDG with 9-11 double bounds. Eigenvalues scree plot.

**Table S2**

PCA analysis (additional data) of coral glycolipid molecular species grouping on the basis of double bounds: MGDG and DGDG with 0-5 double bounds, MGDG and DGDG with 6-8 double bounds, and MGDG and DGDG with 9-11 double bounds.

| Rotation (n x k) = (6 x 6): |            |              |             |            |             |             |
|-----------------------------|------------|--------------|-------------|------------|-------------|-------------|
|                             | PC1        | PC2          | PC3         | PC4        | PC5         | PC6         |
| 0-5 MGDG                    | 0.4041129  | -0.392450685 | -0.53531929 | 0.3424240  | -0.32437155 | -0.41669814 |
| 6-8 MGDG                    | 0.4161161  | 0.347296147  | 0.60637627  | 0.4007562  | 0.05741072  | -0.41789838 |
| 9-11 MGDG                   | -0.5312046 | 0.020906151  | 0.07762616  | -0.3328979 | -0.20742735 | -0.74666705 |
| 0-5 DGDG                    | 0.2012324  | -0.639215860 | 0.21590517  | -0.2716096 | 0.62747239  | -0.19183368 |
| 6-8 DGDG                    | 0.2689449  | 0.562414009  | -0.50714659 | -0.2989807 | 0.46337010  | -0.22374128 |
| 9-11 DGDG                   | -0.5182046 | -0.004934181 | -0.18947966 | 0.6694460  | 0.48992606  | -0.08574148 |
| Importance of components:   |            |              |             |            |             |             |
| Standard deviation          | 1.86620356 | 1.42684198   | 0.60095747  | 0.33601517 | 0.06862602  | 0.05138728  |
| Proportion of Variance      | 0.5805     | 0.3393       | 0.06019     | 0.01882    | 0.00078     | 0.00044     |
| Cumulative Proportion       | 0.5805     | 0.9198       | 0.97996     | 0.99877    | 0.99956     | 1.00000     |

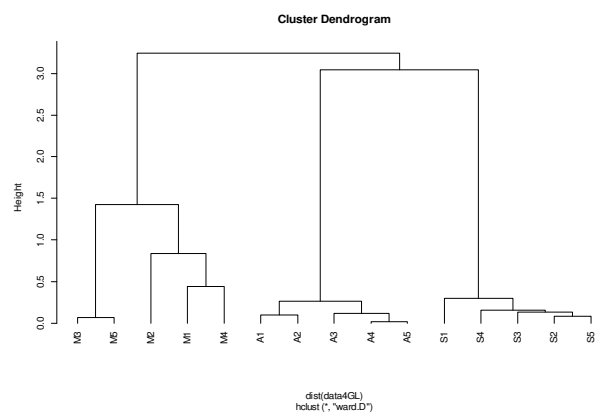

**Figure S2** Cluster analysis (Wards method and Euclidean distances) of coral glycolipid molecular species grouping on the basis of double bounds: MGDG and DGDG with 0-5 double bounds, MGDG and DGDG with 6-8 double bounds, and MGDG and DGDG with 9-11 double bounds. *Acropora* sp. colonies A1-A5; *Sinularia flexibilis* colonies S1-S5 and *Millepora phlatyphylla* colonies M1-M5.

**Table S3**

Colonies of three tropical coral species and sample collection conditions.

| Coral species | <i>Acropora</i> sp.                                                               | <i>Sinularia flexibilis</i>                                                        | <i>Millepora phlatyphylla</i>                                                       |
|---------------|-----------------------------------------------------------------------------------|------------------------------------------------------------------------------------|-------------------------------------------------------------------------------------|
| Image         |  |  |  |

|                      |                                                   |                                                   |                                                   |
|----------------------|---------------------------------------------------|---------------------------------------------------|---------------------------------------------------|
| Location of sampling | Hon Tam, South China Sea; 12.174820°, 109.238961° | Hon Mot, South China Sea; 12.181341°, 109.276905° | Hon Tre, South China Sea; 12.180763°, 109.283778° |
| Temperature, °C      | 26.4                                              | 27.2                                              | 27.0                                              |
| Depth, m             | 3.0                                               | 7.5                                               | 8.1                                               |
| DO, mg/l             | 6.57                                              | 6.65                                              | 6.85                                              |
| Salinity, ‰          | 33.57                                             | 33.44                                             | 33.49                                             |
| Date, d.m.y          | 04.04.2021                                        | 04.04.2021                                        | 04.04.2021                                        |

*The annual range condition in Nha Trang*

The time of year with warmer water lasts for 2.4 months, from August 2 to October 16, with an average temperature above 28°C. The month of the year in Nha Trang with the warmest water is September, with an average temperature of 29°C. The time of year with cooler water lasts for 2.6 months, from December 17 to March 5, with an average temperature below 25°C. The month of the year in Nha Trang with the coolest water is January, with an average temperature of 25°C. The average surface water temperature in Nha Trang is *increasing* during the spring, *rising* by 3°C, from 25°C to 29°C, over the course of the season. The highest average surface water temperature during the spring is 29°C on May 22. The average surface water temperature in Nha Trang is gradually increasing during April, rising by 2°C, from 27°C to 28°C, over the course of the month.

<https://weatherspark.com/y/120736/Average-Weather-in-Nha-Trang-Vietnam-Year-Round#Figures-WaterTemperature>

The average daily incident shortwave solar energy in Nha Trang is very rapidly decreasing during the spring, falling by 2.5 kWh, from 6.4 kWh to 3.9 kWh, over the course of the season. The highest average daily incident shortwave solar energy during the spring is 6.6 kWh on March 23. The brighter period of the year lasts for 2.4 months, from February 14 to April 26, with an average daily incident shortwave energy per square meter above 6.1 kWh. The brightest month of the year in Nha Trang is March, with an average of 6.6 kWh. The darker period of the year lasts for 5.0 months, from May 21 to October 21, with an average daily incident shortwave energy per square meter below 4.4 kWh. The darkest month of the year in Nha Trang is June, with an average of 3.8 kWh. The average daily incident shortwave solar energy in Nha Trang is gradually decreasing during April, falling by 0.7 kWh, from 6.6 kWh to 5.9 kWh, over the course of the month. <https://weatherspark.com/y/120736/Average-Weather-in-Nha-Trang-Vietnam-Year-Round#Figures-SolarEnergy>



**Table S4**  
Primers and amplification conditions used in this study.

| Gene                           | Primer name            | Primer sequence (5'→3')                                     | Program                                                                                                 | Reference                   |
|--------------------------------|------------------------|-------------------------------------------------------------|---------------------------------------------------------------------------------------------------------|-----------------------------|
| <b>Symbiodiniaceae</b>         |                        |                                                             |                                                                                                         |                             |
| 28S rRNA (D1-D2)               | 28Szoox-D1/D2F         | CCTCAGTAATGGCGAATGAACA                                      | 96°C - 3 min (96°C 60s, 55°C 60s, 72°C 120s) x5, (96°C 30s, [55→50]°C 60s, 72°C 120s)x30, 72°C 7 min    | Loh et al., 2001            |
|                                | 28Szoox-D1/D2R         | CCTTGGTCCGTGTTTCAAGA                                        |                                                                                                         |                             |
| ITS2                           | ITSintfor2             | GAATTGCAGAACTCCGTG                                          | 96°C - 3 min (96°C 30s, [62→52]°C 30s, 72°C 120s) x20, (92°C 30s, 52°C 30s, 72°C 120s) x20, 72°C 10 min | LaJeunesse and Trench, 2000 |
|                                | ITS2clamp<br><i>or</i> | CGCCCGCCGCGCCCGCGCCCGTCCCGCGG<br>GATCCATATGCTTAAGTTCAGCGGGT |                                                                                                         | Coleman et al., 1994        |
|                                | ITS-Reverse            | GGGATCCATATGCTTAAGTTCAGC GGGT                               |                                                                                                         |                             |
| ITS region                     | zITSf                  | CCGGTGAATTATTCGACTGACGCAGTGCT                               |                                                                                                         | Hunter et al., 1997         |
|                                | zITSr                  | TCCTCCGCTTATTGATATGC                                        |                                                                                                         | White et al., 1990          |
| ITS region clade A-specific    | A (forward)            | CCTCTTGGACCTTCCACAAC                                        |                                                                                                         |                             |
|                                | A (reverse)            | GCATGCAGCAAACTGCTC                                          |                                                                                                         |                             |
| 28S rRNA (D2) clade B-specific | B (forward)            | GTCTTTGTGAGCCTTGAGC                                         | 96°C - 5 min (96°C 30s, 60°C 30s, 72°C 60s) x38, 72°C 5 min                                             | Correa et al., 2009         |
|                                | B (reverse)            | GCACACTAACAAGGTACCATG                                       |                                                                                                         |                             |
| 28S rRNA (D2) clade C-specific | C (forward)            | CTTGAAATCGCTGAAAGGGA                                        |                                                                                                         |                             |
|                                | C (reverse)            | CTATTCACGCTTAAGCACACA                                       |                                                                                                         |                             |
| 28S rRNA (D2) clade D-specific | D (forward)            | GCCGTGTACGGTGCTCGCTCTCAA                                    |                                                                                                         |                             |
|                                | D (reverse)            | GGCCACTCGCAAATGGACAGC                                       |                                                                                                         |                             |
| ITS2 A-specific                | S.S. ITS2 F            | TTCTGCTGCTCTTGTTATCAGG                                      |                                                                                                         |                             |
|                                | S.S. ITS2 R            | ACACACATGAGCTTTTGTTCG                                       |                                                                                                         |                             |
| ITS2 B-specific                | S.B. ITS2 F            | GCAAGCAGCATGTATGTC                                          |                                                                                                         |                             |
|                                | S.B. ITS2 R            | CTTGGAACAACAGTACGCTC                                        |                                                                                                         |                             |
| ITS2 C-specific                | S.C. ITS2 F            | TGCGTTCTTATGAGCTATTGCC                                      | 96°C - 3 min (96°C 30s, [62→52]°C 30s, 72°C 120s) x20, (92°C 30s, 52°C 30s, 72°C 120s) x20, 72°C 10 min | Saad et al., 2020           |
|                                | S.C. ITS2 R            | CAGCGTCACTCAAGTAAAACCA                                      |                                                                                                         |                             |
| ITS2 D-specific                | S.D. ITS2 F            | TTTGCTTCAGTGCTTATTTTACCT                                    |                                                                                                         |                             |
|                                | S.D. ITS2 R            | ACGGCGCAGAAGGACAC                                           |                                                                                                         |                             |
| ITS2 E-specific                | S.E. ITS2 F            | GAGGTAAGCTGGACTGATTTG                                       |                                                                                                         |                             |
|                                | S.E. ITS2 R            | TTAGTTCCTTTTCTCCGCT                                         |                                                                                                         |                             |
| ITS2 F-specific                | S.F. ITS2 F            | CCTGTGAGCCATTGAAACTCTAGT                                    |                                                                                                         |                             |
|                                | S.F. ITS2 R            | CAGCGTCACTCAAGAAATACCAT                                     |                                                                                                         |                             |

|                                               |             |                           |                                                                                                         |                       |
|-----------------------------------------------|-------------|---------------------------|---------------------------------------------------------------------------------------------------------|-----------------------|
| ITS2 G-specific                               | S.G. ITS2 F | CAGTGCAATGCCTCCTTGTG      |                                                                                                         |                       |
|                                               | S.G. ITS2 R | CCCACGCATATTCCGGAGA       |                                                                                                         |                       |
| 28S rRNA (D2) clade A-specific                | SymA-28S F  | GATTGTGGCCTTTAGACATACTACC |                                                                                                         |                       |
|                                               | SymA-28S R  | CTCTGAGAGCAAGTACCGTGC     |                                                                                                         |                       |
| 28S rRNA (D2) clade B-specific                | SymB-28S F  | CACATGTCGTGCTGAGATTGC     |                                                                                                         |                       |
|                                               | SymB-28S R  | CTCGCATGCTGAGAAACACTG     |                                                                                                         |                       |
| 28S rRNA (D2) clade C-specific                | SymC-28S F  | TTGCTGAGATTGCTGTAGGCT     |                                                                                                         |                       |
|                                               | SymC-28S R  | TCCTCAAACAGGTGTGGC        | 96°C - 3 min (96°C 30s, [62→55]°C 30s, 72°C 120s) x20, (92°C 30s, 55°C 30s, 72°C 120s) x20, 72°C 10 min | Yamashita et al. 2011 |
| 28S rRNA (D2) clade D-specific                | SymD-28S F  | AATGCTTGTGAGCCCTGGTC      |                                                                                                         |                       |
|                                               | SymD-28S R  | AAGGCAATCCTCATGCGTATG     |                                                                                                         |                       |
| 28S rRNA (D2) clade E-specific                | SymE-28S F  | CGAGTTTTCACTAGCCTTGTGTG   |                                                                                                         |                       |
|                                               | SymE-28S R  | AGCGTTGCAGCTGACGAG        |                                                                                                         |                       |
| 28S rRNA (D2) clade F-specific                | SymF-28S F  | ACAGATCTTGCTGAGATTGCTGTG  |                                                                                                         |                       |
|                                               | SymF-28S R  | GAAGGCCGTCCTCAAACAGAC     |                                                                                                         |                       |
| <i>Ostreobium</i> (Bryopsidales, Ulvophyceae) |             |                           |                                                                                                         |                       |
| 23S rRNA                                      | 16Sar*      | CGCCTGTTTATCAAAAACAT      | 96°C - 5 min (96°C 30s, 55°C 30s, 72°C 60s) x38, 72°C 5 min                                             | Palumbi et al. 1996   |
|                                               | 16Sbr*      | CCGGTYTGAACTCAGATCAYGT    |                                                                                                         |                       |

\* - Universal primers that were designed to amplify a partial 16S mtDNA are able to amplify another partial plastid gene, the 23S rRNA. The result from this is a cross homology of primers to other region of the template strand, and the outcome is amplification of other genes outside the region of target (<https://www.benchling.com/primers/>).

16:0/16:3; 16:1/16:2 DGDG molecular species with RT = 12.30 min gave positive ions  $[M+Na]^+$  at  $m/z$  909.553 corresponding to the composition  $[C_{47}H_{82}O_{15}+Na]^+$  (calculated 909.555) (Fig. S3(b)). MS<sup>2</sup> fragmentation of these ions (Fig. S3(c)) resulted in the formation of ions at  $m/z$  659.350 ( $[C_{31}H_{56}O_{13}+Na]^+$ ),  $m/z$  657.341 ( $[C_{31}H_{54}O_{13}+Na]^+$ ) and  $m/z$  653.312 ( $[C_{31}H_{52}O_{13}+Na]^+$ ), corresponding to elimination of 16:3, 16:2 and 16:0 acyl fragment, respectively. According to the elemental composition calculated and the value of monoisotopic molecular mass, this component was identified as 16:0/16:3; 16:1/16:2 DGDG.

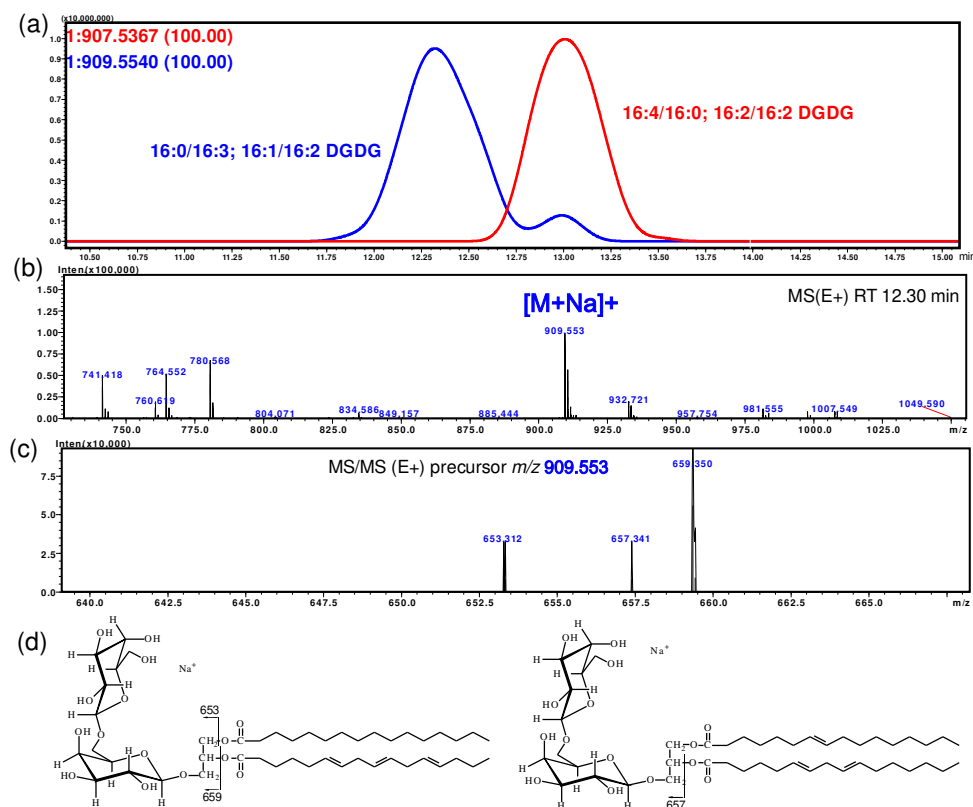

**Figure S3** Electrospray ionization mass spectra of 16:0/16:3; 16:1/16:2 DGDG. The total lipids of *S. flexibilis* corals were analyzed using normal phase liquid chromatography – high resolution tandem mass spectrometry (LC–HRMS) detecting negative and positive ions. Total ion current chromatogram of two molecular species DGDG (16:0/16:3; 16:1/16:2 DGDG and 16:4/16:0; 16:2/16:2 DGDG) are presented (a). The mass spectra for 16:0/16:3; 16:1/16:2 DGDG eluting between 11.8–12.8 min (b). The MS/MS spectra of  $m/z$  909.553 (c) are presented. The predicted structures of 16:0/16:3 DGDG and 16:1/16:2 DGDG, and the product ions are shown (d).

18:4/18:4 DGDG molecular species with RT = 13.53 min gave positive ions  $[M+Na]^+$  at  $m/z$  955.534 corresponding to the composition  $[C_{51}H_{80}O_{15}+Na]^+$  (calculated 955.539) (Fig. S4(b)). MS<sup>2</sup> fragmentation of these ions (Fig. S4(c)) resulted in the formation of ions at  $m/z$  679.322 ( $[C_{33}H_{52}O_{13}+Na]^+$ ) and  $m/z$  517.275 ( $[C_{33}H_{52}NaO_{13} - C_6H_{11}O_5+Na]^+$ ), corresponding to elimination of 18:4 acyl fragment and 18:4 acyl fragment and galactose fragment, respectively. Additional ions  $m/z$  405.141 ( $[C_{14}H_{23}O_{12}+Na]^+$ ) and  $m/z$  347.101 ( $[C_{12}H_{20}O_{10}+Na]^+$ ) corresponded to galactose-containing fragments. According to the elemental composition calculated and the value of monoisotopic molecular mass, this component was identified as 18:4/18:4 DGDG.

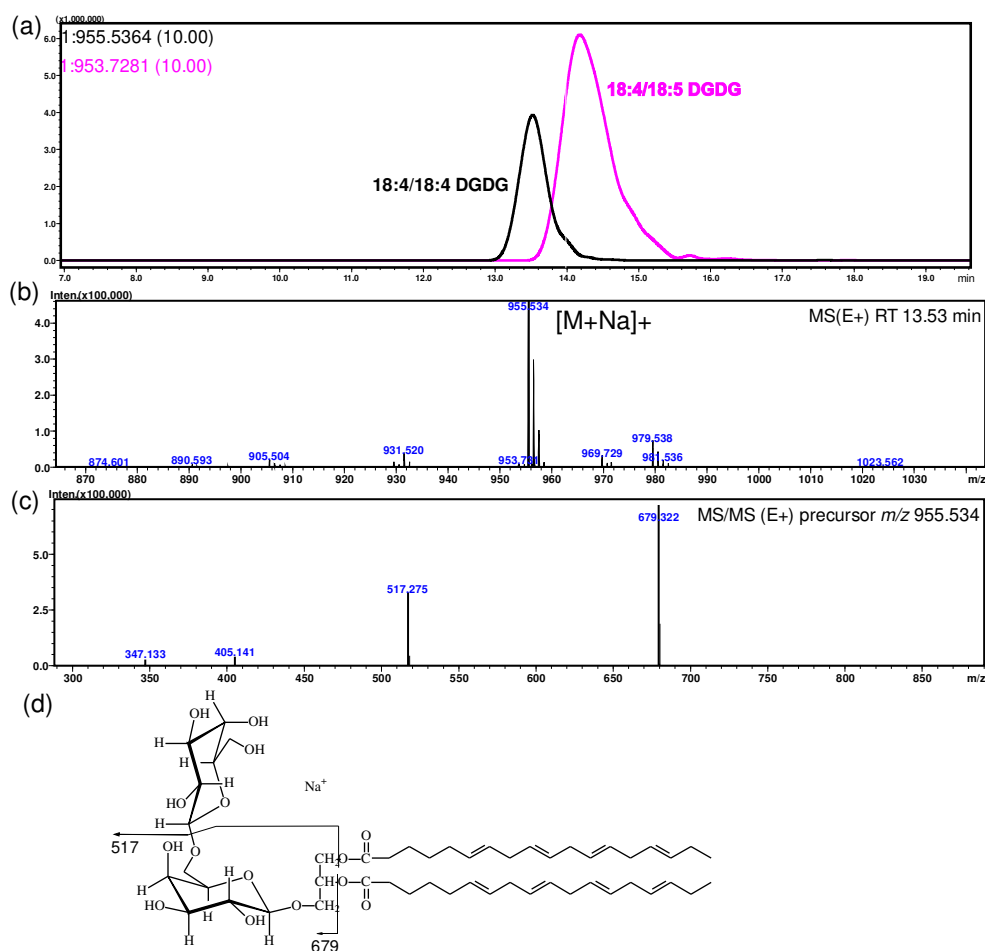

**Figure S4** Electrospray ionization mass spectra of 18:4/18:4 DGDG. The total lipids of *S. flexibilis* corals were analyzed using normal phase liquid chromatography – high resolution tandem mass spectrometry (LC–HRMS) detecting negative and positive ions. Total ion current chromatogram of two molecular species DGDG (18:4/18:4 DGDG and 18:4/18:5 DGDG) are presented (a). The mass spectra for 18:4/18:4 DGDG eluting between 13.0–14.0 min (b). The MS/MS spectra of m/z 955.534 (c) are presented. The predicted structures of 18:4/18:4 DGDG, and the product ions are shown (d).
